# Supplementary figures and images for: Metabolic intervention on lipid synthesis converging pathways abrogates prostate cancer growth
Source: PubMed Central journal article supplement — Oncogene. 2012 Dec 3;32(42):5101–10. doi: 10.1038/onc.2012.523 (PMC3806338; doi:10.1038/onc.2012.523), 2012-12-03

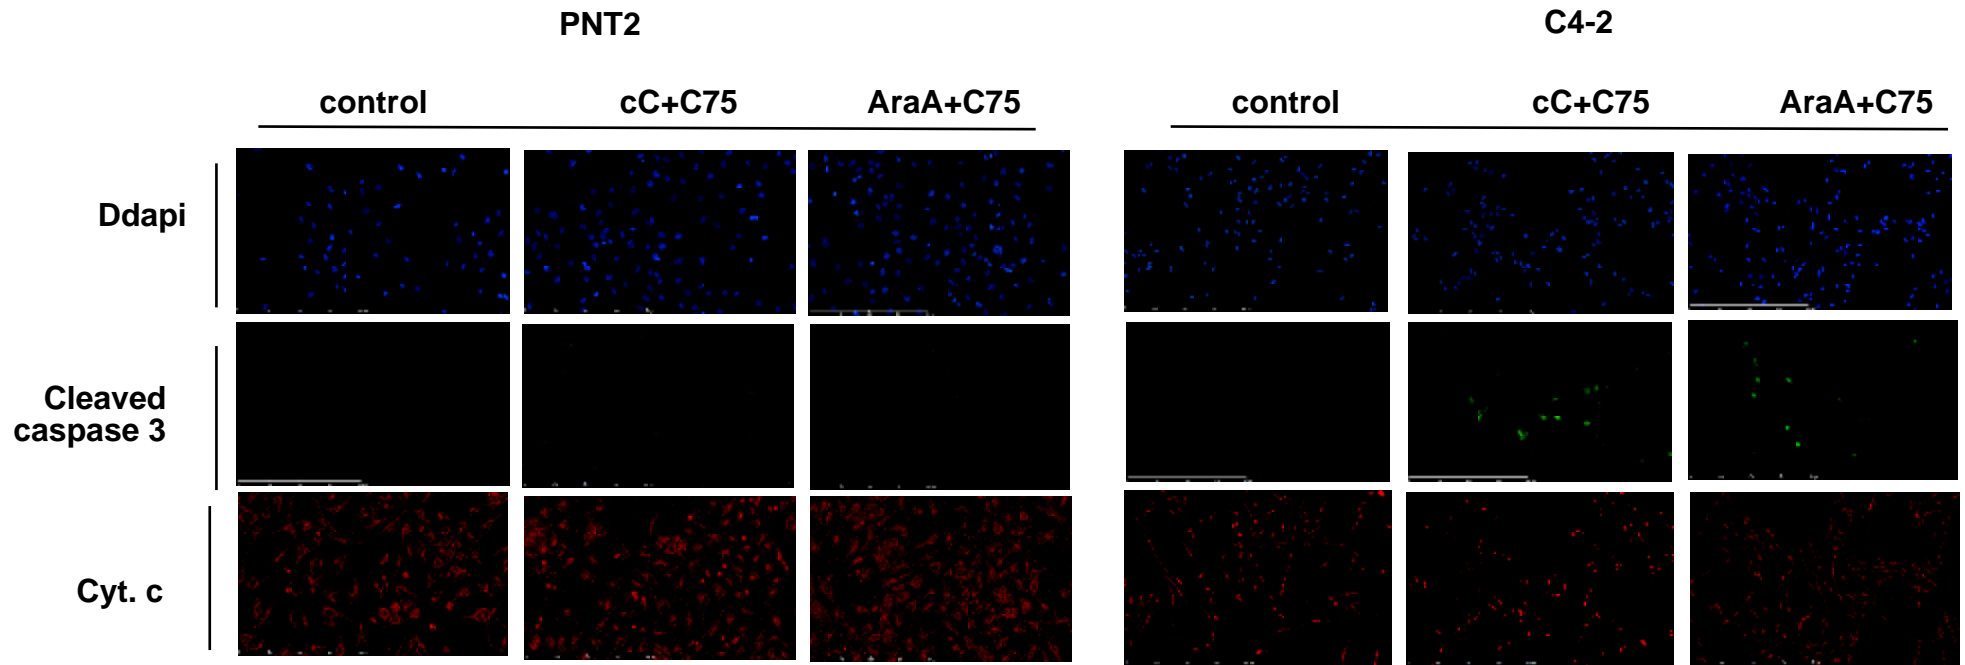

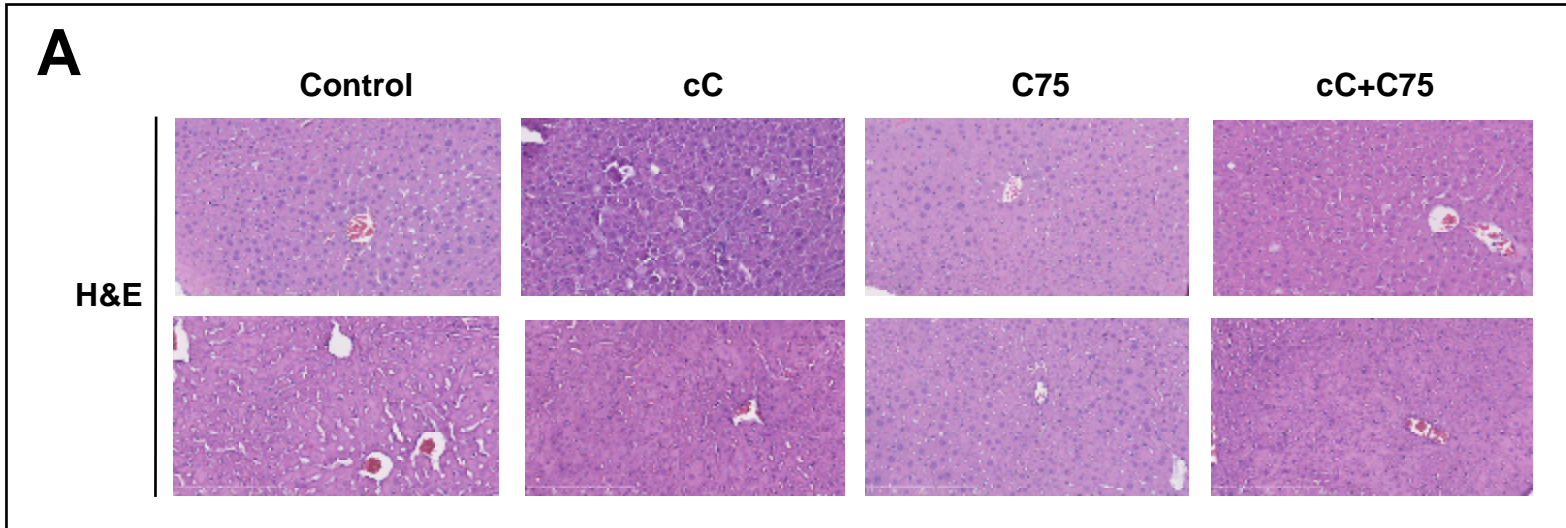

**B**

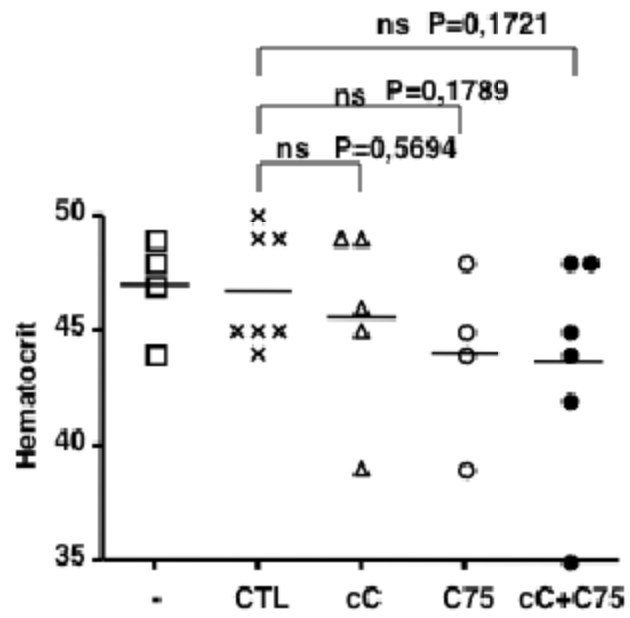

Supplement: onc2012523x1.pdf [file onc2012523x1.pdf]
